# Supplementary material for: Assessing gage: an online tool for improving gender visibility in STEMM
Source: Atypon-hosted journal article supplement (doi:10.1139/facets-2021-0033), 2021-01-01
Supplement: facets-2021-0033_supplement1.pdf [file facets-2021-0033_supplement1.pdf]

# Gage: New Platform Survey

We are assessing the impact of the Gage platform through 2020 to better understand the use of the Gage platform and continue to improve it.

\* Required

1. Are you a member of the Gage platform? Check here or Sign up!  
<https://gage.500womenscientists.org/> \*

*Mark only one oval.*

Yes

No

## Contacts via the Platform

2. Have you been contacted about your profile or by someone who found you via the Gage platform since signing up? \*

*Mark only one oval.*

Yes    *Skip to question 3*

No    *Skip to question 9*

## Details on Contacts from the Platform

3. How many times have you been contacted? \*

*Mark only one oval.*

One time

Two times

Three times

Four times or more

## 4. Who contacted you? (check all that apply) \*

*Check all that apply.*

- Pre K-12 School
- University or Institution of Higher Education
- Member of the Media
- Organizer of a conference, meeting or panel
- Organization other than educational or media
- Members of 500 WS Leadership
- Another Womxn Scientist
- Government Organization/Institute

Other:  \_\_\_\_\_

## 5. What was the outcome of the contact(s)? (check all that apply). \*

*Check all that apply.*

- An email or phone call
- Multiple email exchanges or phone calls
- An invitation to speak on a panel or at a conference
- An interview for the media
- An invitation to a classroom (PreK-12)
- An invitation to a class (University)
- An invitation to collaborate
- Mentorship or a mentoring interaction

Other:  \_\_\_\_\_

## 6. Please provide details about how you shared your science expertise during this experience, including who your audience was and if it was in-person or virtually.

---

---

---

---

---

7. Did you receive any compensation/payment? \*

*Mark only one oval.*

Yes

No

8. If you received compensation/payment, in what form did you receive it? (check all that apply)

*Check all that apply.*

Fee for services

Coverage of expenses

Honorarium

Other:  \_\_\_\_\_

### Your Use of the Platform

9. Have you used the platform yourself to search for other women scientists? \*

*Mark only one oval.*

Yes

No

10. If you used the platform yourself, how did you use it? (check all that apply.)

*Check all that apply.*

To find potential colleagues in my own field

To find a relevant expert in another field

To find women scientists in my geographical area irrespective of speciality

To find women scientists in my specialty around the world

Other:  \_\_\_\_\_

## Value of the Gage Platform

11. What was your PRIMARY reason for joining the platform? \*

*Mark only one oval.*

- Visibility
- Contacts
- Building a national network/connections
- Building a regional network/connections
- Advocacy
- A resource to reach other women scientists
- To find women scientists for talks, events, panels I organize
- Community Building
- Empowerment
- To be an available resource to others
- Increasing the presence of women's voices in science
- Eliminating the existence of things like male-dominated opportunities (e.g., all male panels)

12. What was your SECONDARY reason for joining the platform? \*

*Mark only one oval.*

- Visibility
- Contacts
- Building a national network/connections
- Building a regional network/connections
- Advocacy
- A resource to reach other women scientists
- To find women scientists for talks, events, panels I organize
- Community Building
- Empowerment
- To be an available resource to others
- Increasing the presence of women's voices in science
- Eliminating the existence of things like male-dominated opportunities (e.g., all male panels)

13. What do you see now as the top two most valuable aspects of the platform?  
(check TWO) \*

*Check all that apply.*

- Visibility
- Contacts
- Building a national network/connections
- Building a regional network/connections
- Advocacy
- A resource to reach other women scientists
- To find women scientists for talks, events, panels I organize
- Community Building
- Empowerment
- To be an available resource to others
- Increasing the presence of women's voices in science
- Eliminating the existence of things like male-dominated opportunities (e.g., all male panels)

14. How well has the platform met your expectations so far? \*

Mark only one oval.

|                          |                       |                       |                       |                       |                       |                      |
|--------------------------|-----------------------|-----------------------|-----------------------|-----------------------|-----------------------|----------------------|
|                          | 1                     | 2                     | 3                     | 4                     | 5                     |                      |
| Has not met expectations | <input type="radio"/> | Exceeds expectations |

15. Please describe how the platform met your expectations and/or what needs improvement.

---

---

---

---

---

16. If this platform could do anything, what is one thing you would love to see it be able to do?

---

---

---

---

---

17. Which country do you live in? \*

---

18. Which city do you live in? \*

---

19. We are conducting an impact assessment to better understand the use of the platform. One goal is to learn more about the interactions people have resulting from the platform (e.g., media, conference invitation, etc.). Would you be willing to be contacted about your experience with the platform? If so, please provide your email.
- 

---

This content is neither created nor endorsed by Google.

Google Forms
